# Supplementary material
Source: PubMed Central journal article supplement (PMC7643881)
Supplement: NIHMS1628546-supplement-6.pdf [file NIHMS1628546-supplement-6.pdf]

**Table S1. Oligonucleotides for qPCR (related to Figures 3 and Supplemental Figures 1 and 3).**

| Gene                   | Source       | Identifier    | cDNA Product Size (bp) |
|------------------------|--------------|---------------|------------------------|
| <b>TaqMan Gata4</b>    | ThermoFisher | Mm00484689_m1 | 84                     |
| <b>TaqMan Zfpn2</b>    | ThermoFisher | Mm00496074_m1 | 63                     |
| <b>TaqMan Nr2f2</b>    | ThermoFisher | Mm00772789_m1 | 65                     |
| <b>TaqMan Tbx5</b>     | ThermoFisher | Mm00803518_m1 | 71                     |
| <b>TaqMan Gata6</b>    | ThermoFisher | Mm00802636_m1 | 120                    |
| <b>TaqMan PDGFRa</b>   | ThermoFisher | Mm00440701_m1 | 66                     |
| <b>TaqMan Pax7</b>     | ThermoFisher | Mm01354484_m1 | 68                     |
| <b>TaqMan 18S rRNA</b> | ThermoFisher | 4333760T      | 187                    |
